# Supplementary material
Source: Springer Nature journal article supplement (https://www.springermedizin.de/resource/supplementary/12985_2009_746_MOESM1_ESM.pdf/9608574)

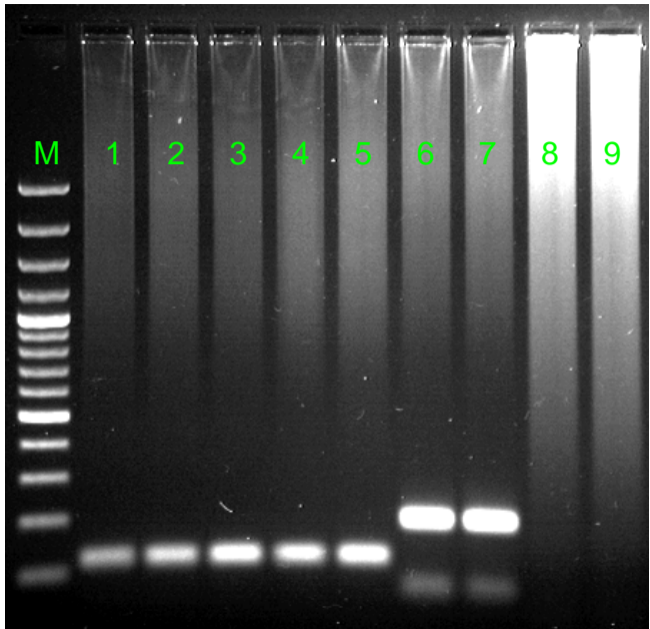

Supplement: MOESM1 [file 9608574]
